# Supplementary material for: 1,25-dihydroxyvitamin D3 ameliorates lupus nephritis through inhibiting the NF-κB and MAPK signalling pathways in MRL/lpr mice
Source: Springer Nature journal article supplement (doi:10.1186/s12882-022-02870-z), 2022-07-08

Fig 6B

1. Scanned files of original, unprocessed images

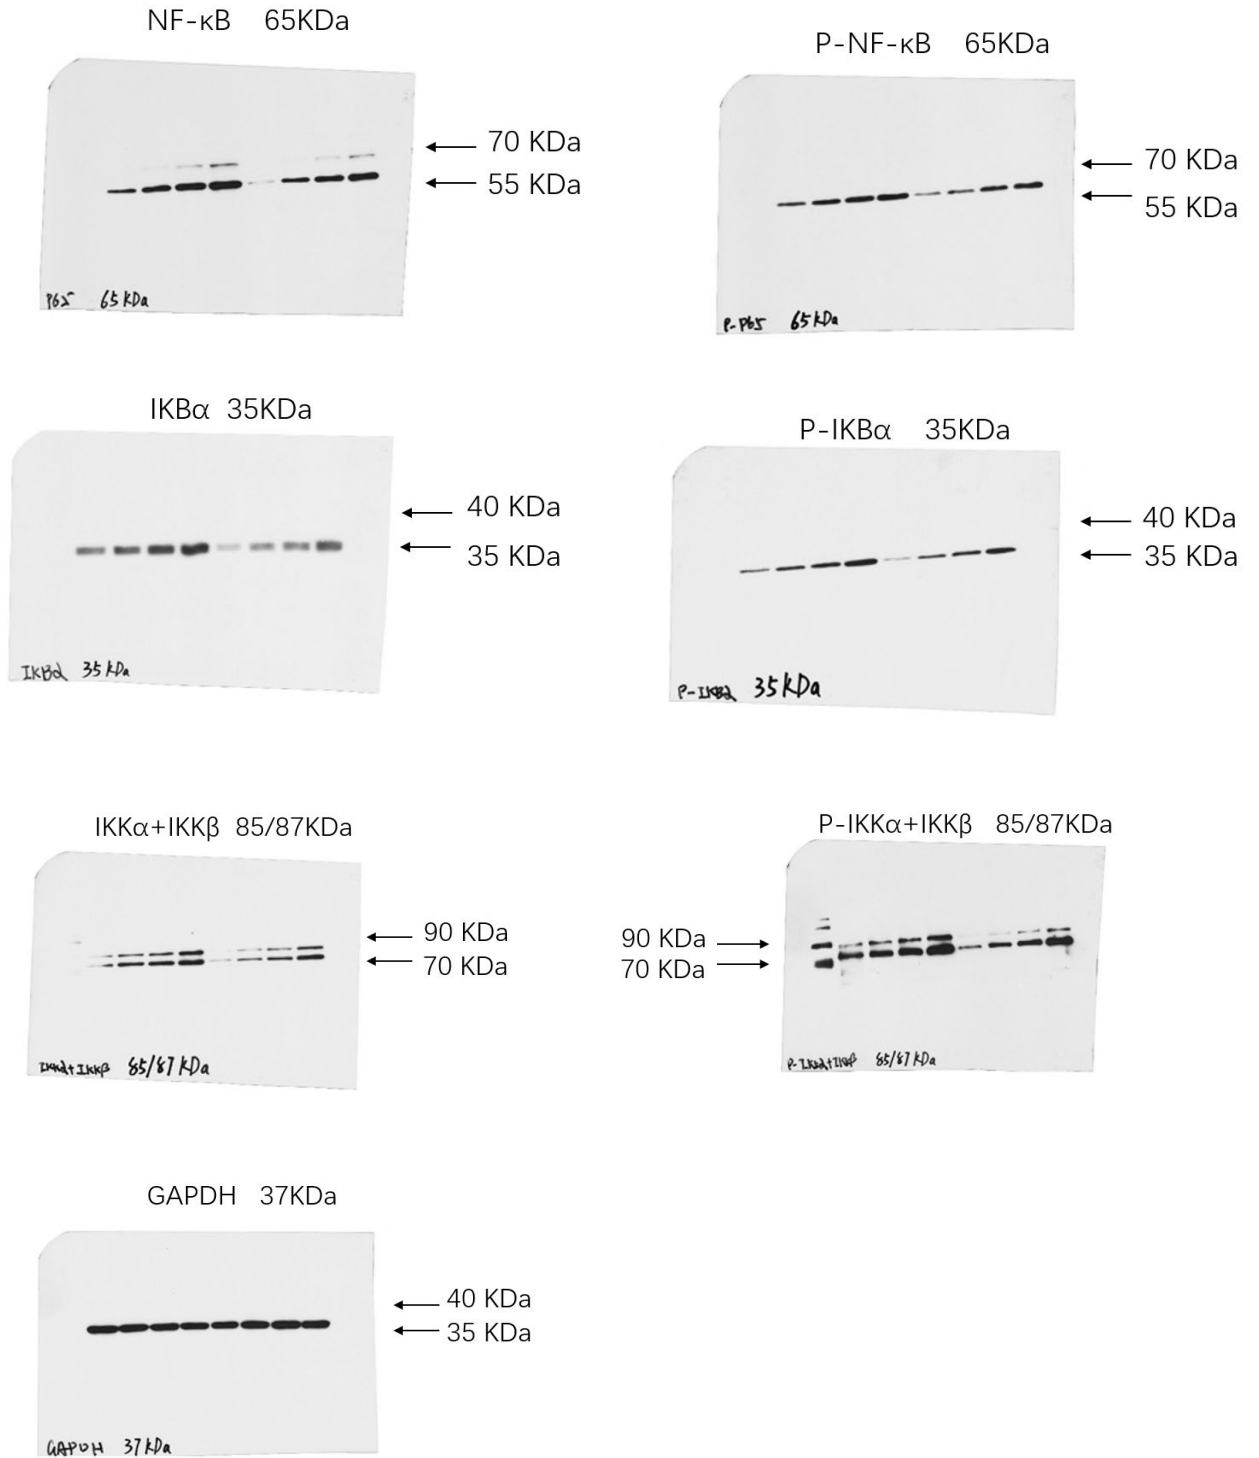

## 2. X-ray films of the original, unprocessed images

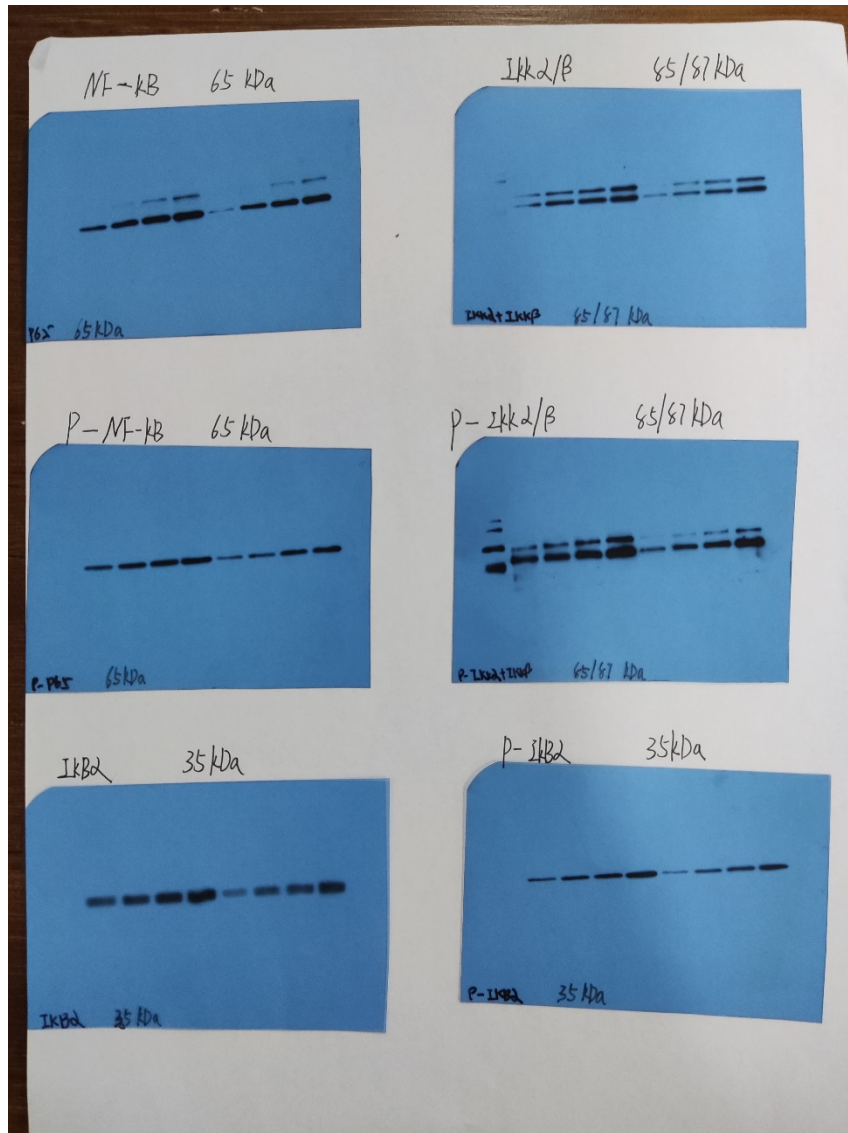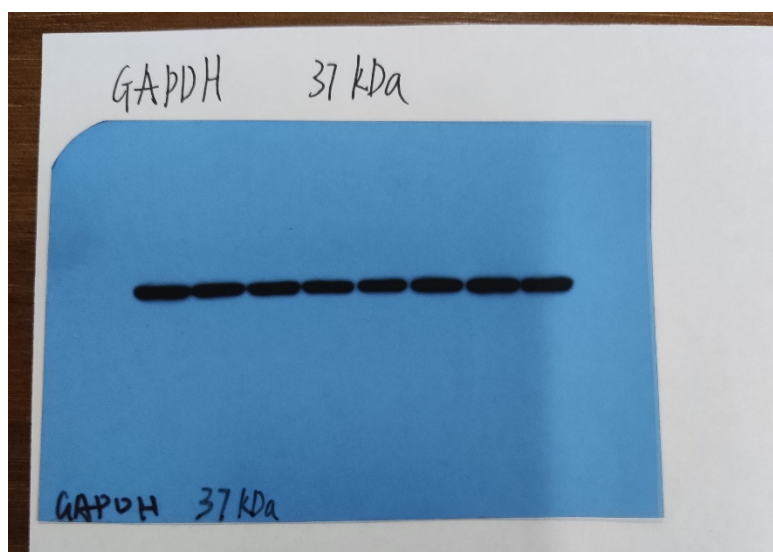

Fig 6C

1. Scanned files of original, unprocessed images

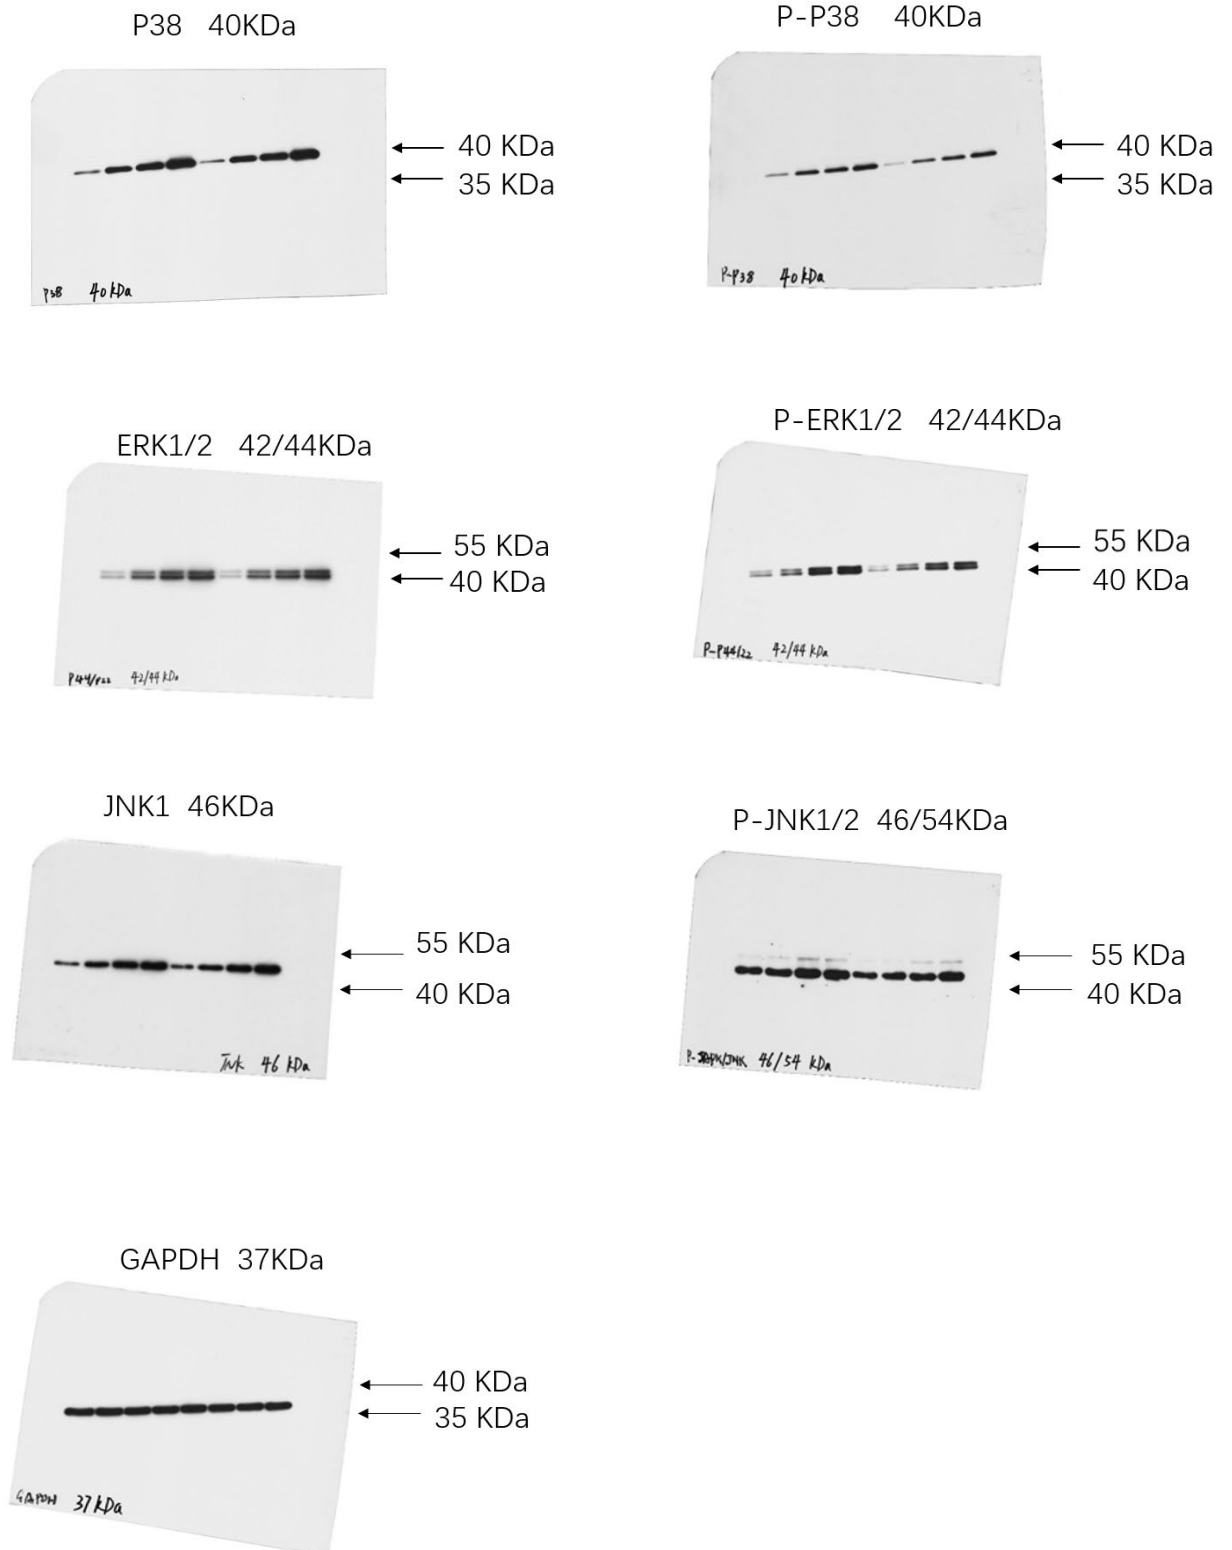

## 2. X-ray films of the original, unprocessed images

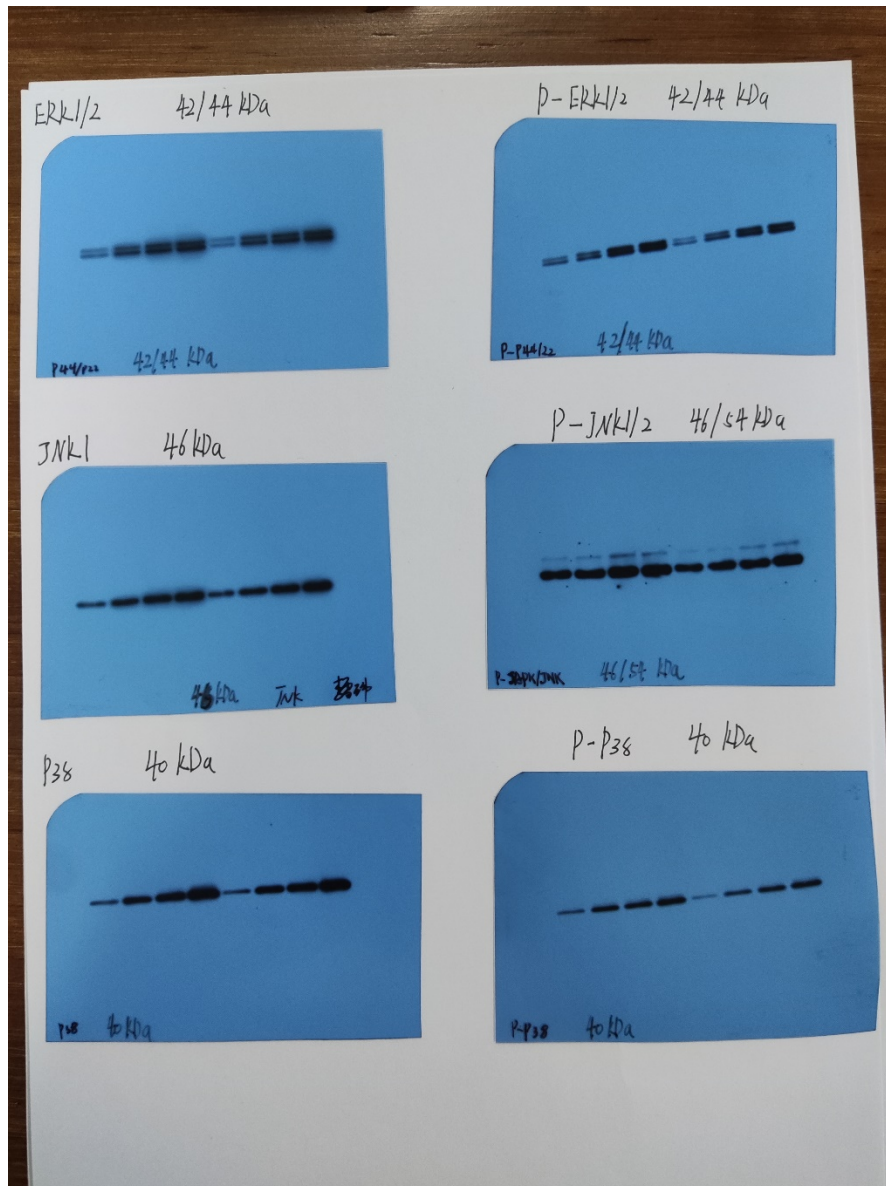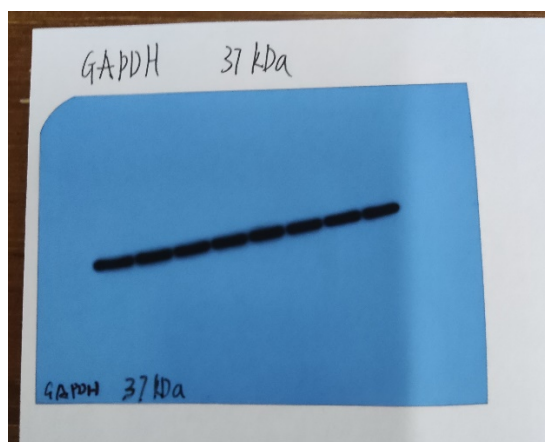

Supplement: MOESM1 [file 23251430]
